# Supplementary material for: Experimental Infection of Dogs with Toscana Virus and Sandfly Fever Sicilian Virus to Determine Their Potential as Possible Vertebrate Hosts
Source: MDPI journal article supplement (doi:10.3390/microorganisms8040596), 2020-04-20
Supplement: s1 [file s1]

## Supplementary Figures

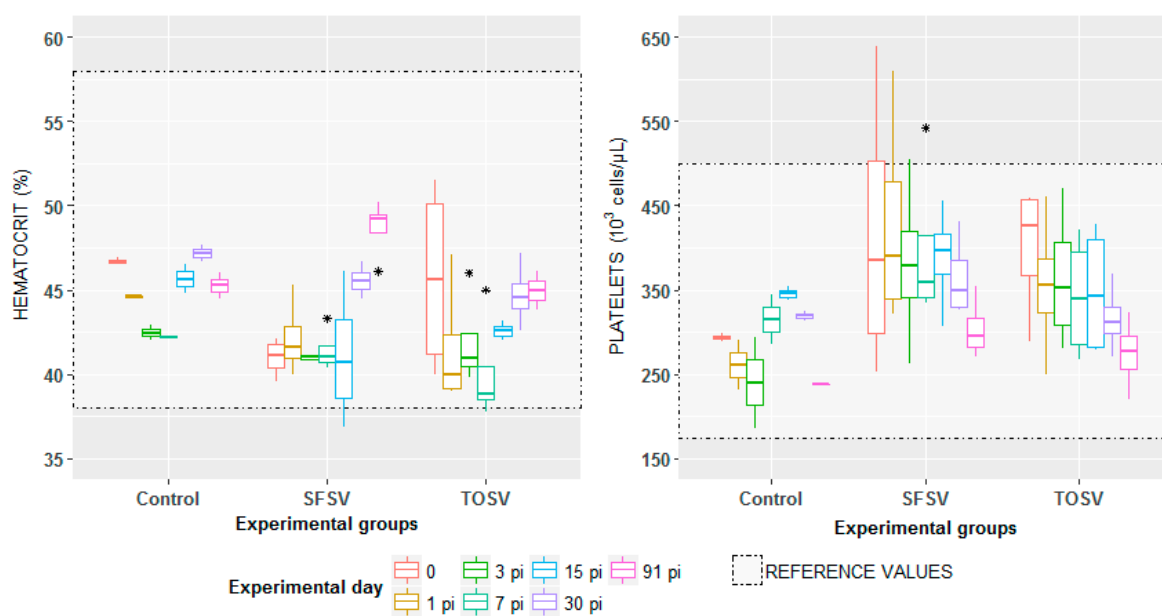

**Supplementary Figure 1.** Hematocrit and platelets values of experimental groups in different experimental days

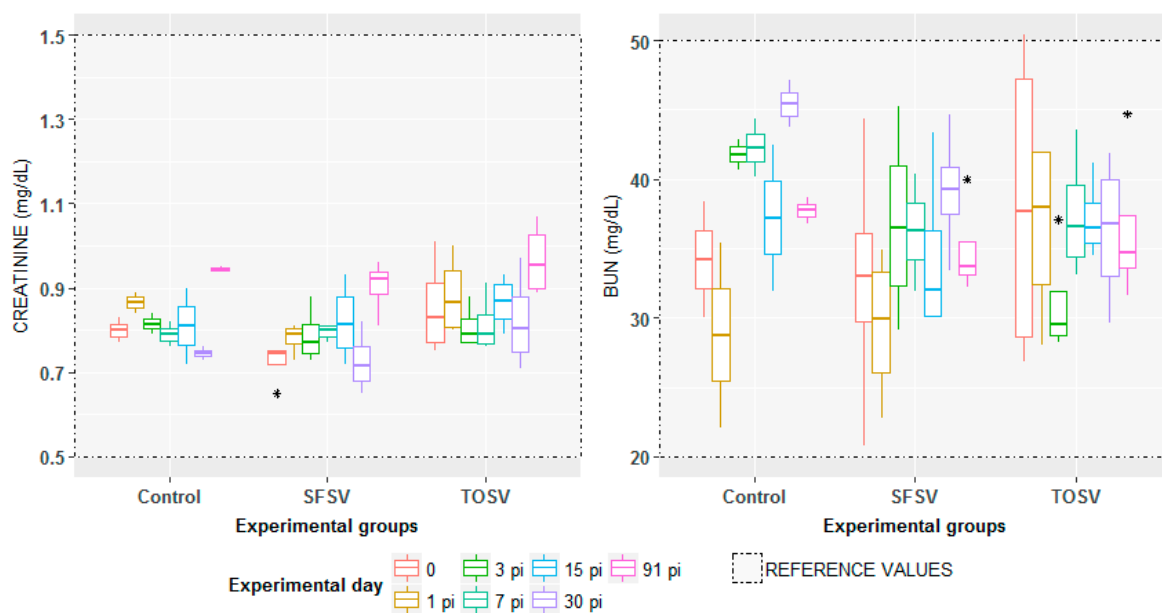

**Supplementary Figure 2.** Creatinine and BUN values of experimental groups in different experimental days.

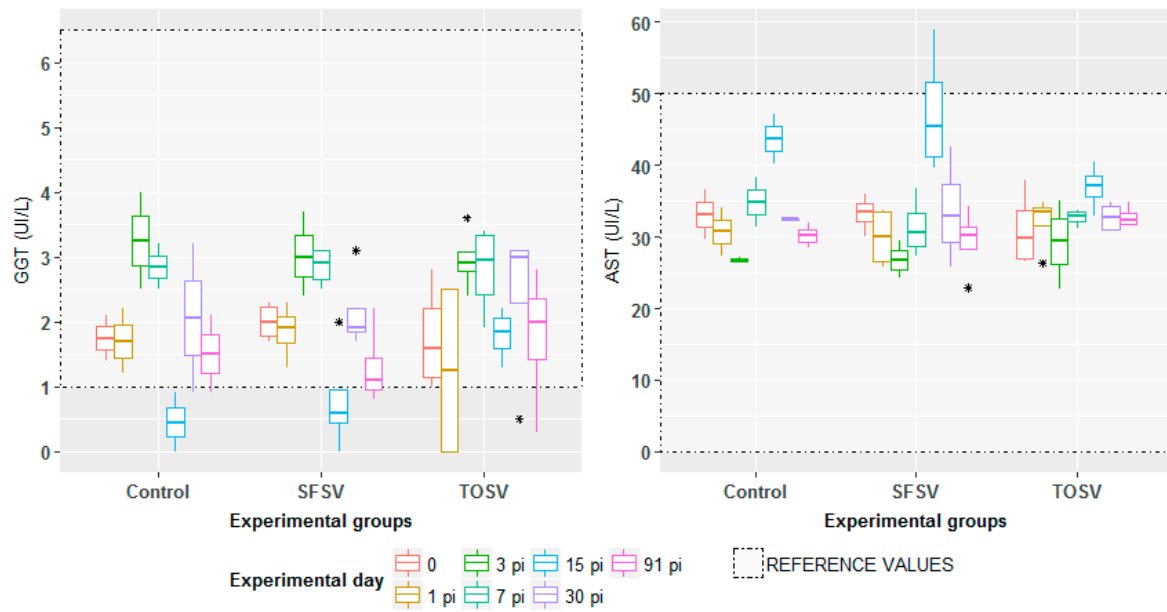

**Supplementary Figure 3.** GGT and AST values of experimental groups in different experimental days.

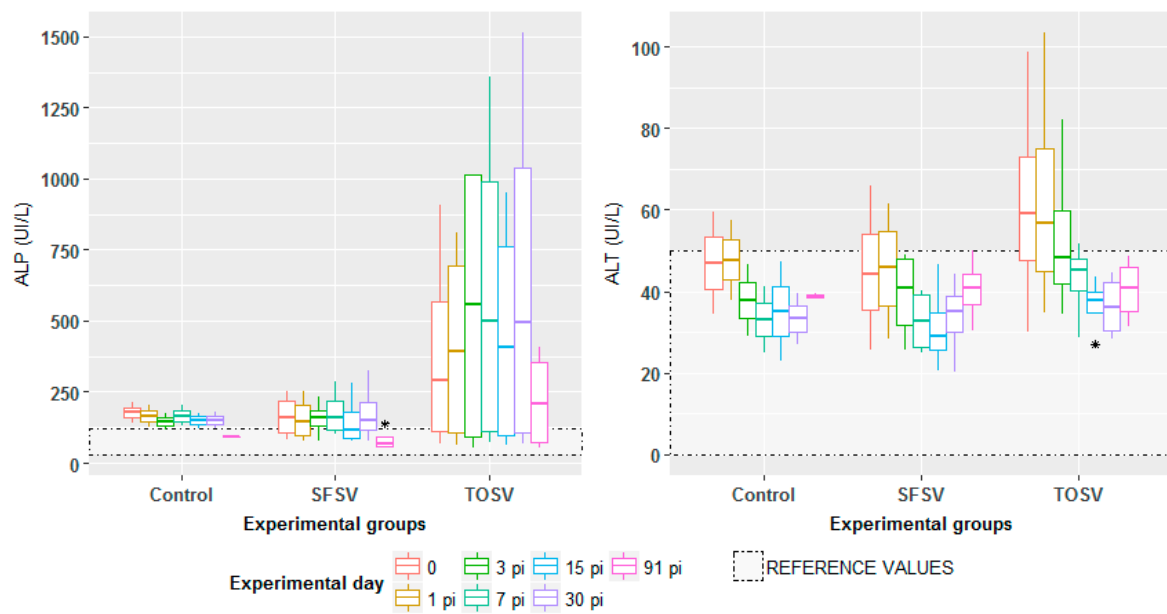

**Supplementary Figure 4.** ALP and ALT values of experimental groups in different experimental days.

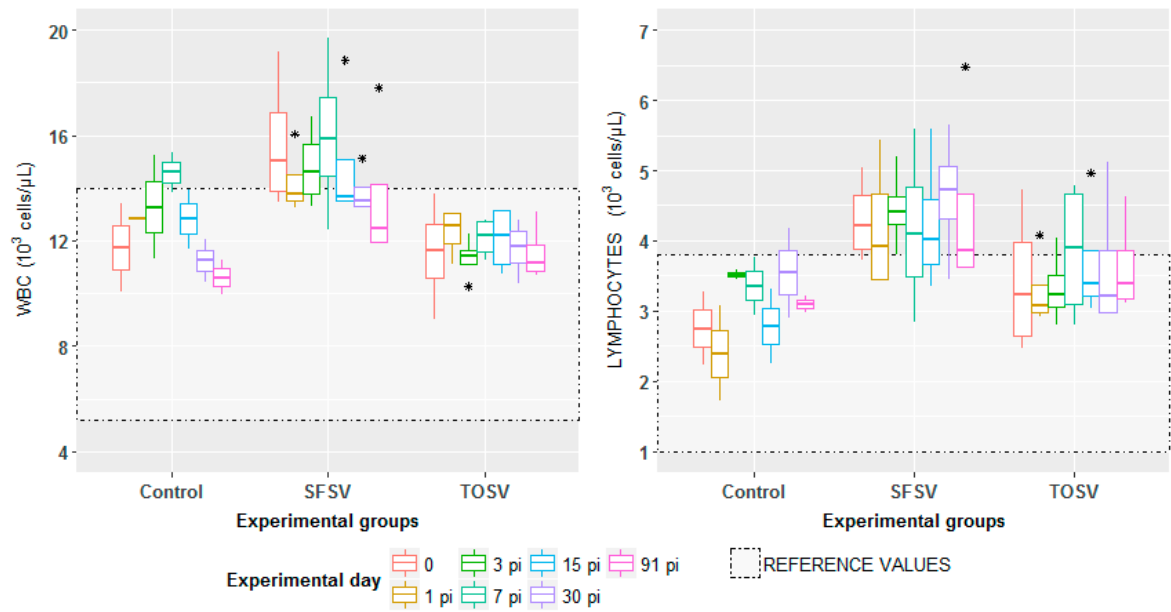

**Supplementary Figure 5.** White blood cells (WBC) and Lymphocytes values of experimental groups in different experimental days.

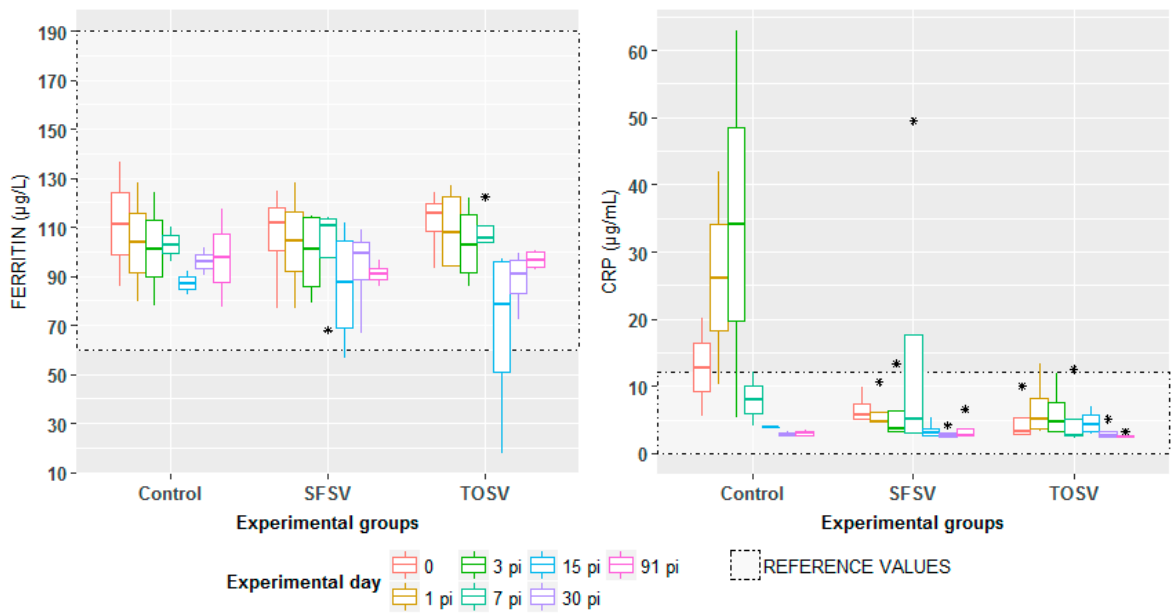

**Supplementary Figure 6.** Ferritin and CRP values of experimental groups in different experimental days.

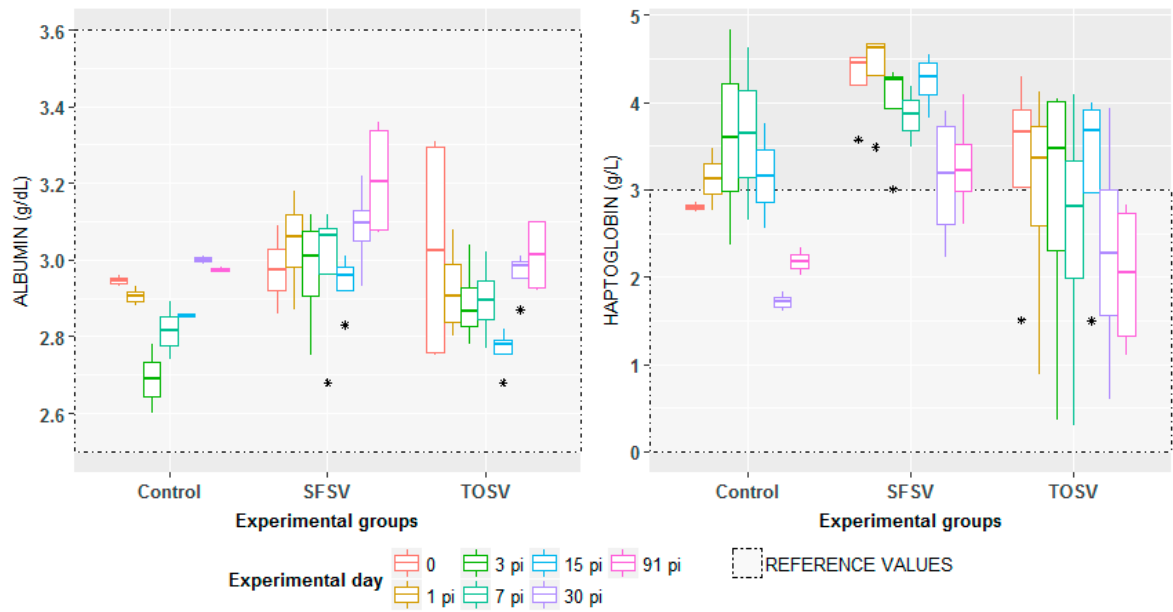

**Supplementary Figure 7.** Albumin and Haptoglobin values of experimental groups in different experimental days.

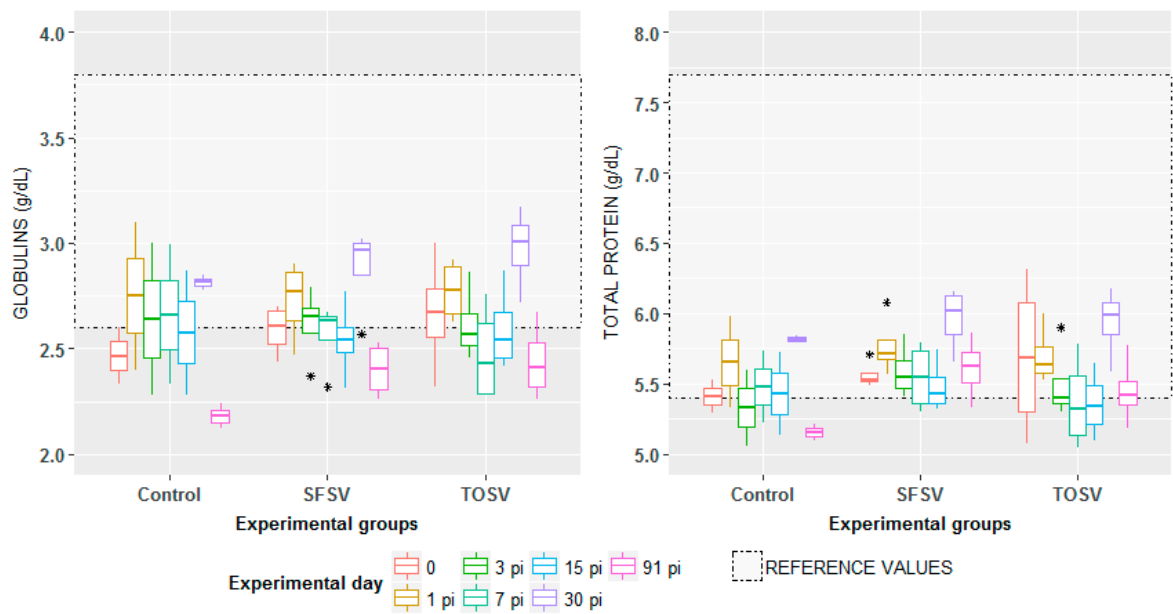

**Supplementary Figure 8.** Globulin and Total protein values of experimental groups in different experimental days.
